# Supplementary material
Source: PubMed Central journal article supplement (PMC11027699)
Supplement: 262_2020_2535_MOESM1_ESM.pdf [file 262_2020_2535_MOESM1_ESM.pdf]

**Table S1. Clinicopathological parameters of the patients.**

|                  | Healthy Controls | Tumor patients<br>(blood) | Tumor patients<br>(TIL) |
|------------------|------------------|---------------------------|-------------------------|
| Mean age (range) | 49.5 (20-84)     | 69.9 (47-90)              | 66.4 (47-90)            |
| Sex              |                  |                           |                         |
| Male             | 36               | 32                        | 32                      |
| Female           | 24               | 10                        | 7                       |
| T classification |                  |                           |                         |
| Tx               |                  | 1                         | 2                       |
| T1               |                  | 8                         | 5                       |
| T2               |                  | 5                         | 7                       |
| T3               |                  | 14                        | 14                      |
| T4               |                  | 14                        | 11                      |
| N classification |                  |                           |                         |
| N0               |                  | 18                        | 14                      |
| N1               |                  | 6                         | 7                       |
| N2               |                  | 15                        | 15                      |
| N3               |                  | 3                         | 3                       |
| M classification |                  |                           |                         |
| M0               |                  | 37                        | 36                      |
| M1               |                  | 3                         | 2                       |
| Mx               |                  | 2                         | 1                       |
| Relapse          |                  | 5                         | 3                       |
| Death            |                  | 8                         | 6                       |
| HPV-status       |                  |                           |                         |
| Positive (p16)   |                  | 2                         | 5                       |
| Localization     |                  |                           |                         |
| Pharynx          |                  | 15                        | 21                      |
| Larynx           |                  | 13                        | 8                       |
| Mouth            |                  | 7                         | 4                       |
| Nose             |                  | 3                         | 2                       |
| CUP              |                  | 1                         | 2                       |
| Other            |                  | 3                         | 2                       |

**Table S2. Genespecific primer and the specific UPL-Probe used for expression level measurements of ADOR at RNA level.**

| Gene             | Primer left             | Primer right          | UPL-Probe No. |
|------------------|-------------------------|-----------------------|---------------|
| RPL13A           | cccctgtttcaaggataaga    | gaccatcaagcaccaggac   | # 63          |
| β-actin          | attggcaatgagcgggtc      | cgtggatgccacaggact    | # 11          |
| PBG-D            | tgccctggagaagaatgaag    | cagcatcatgagggtttcc   | # 79          |
| G6PD             | ctggtggccatggagaag      | tgcattcaacaccttgacct  | # 22          |
| GAPDH            | gctctctgctcctctgttc     | acgaccaaaccggtgactc   | # 60          |
| TBP              | gaacatcatggatcagaacaaca | ataggattccgggagtc     | # 87          |
| ADORA1           | gtcaagatccctctccggtg    | tcccaccacgaaggagag    | # 66          |
| ADORA2A          | tgaccgctacattgccatc     | tccaacctagcatgggagtc  | # 3           |
| ADORA2B          | tctgtgtcccgcctcaggta    | gatgccaaggcaaggac     | # 56          |
| ADORA3           | aggatgtgcggtgcataaa     | ccttagaaagggtcatcaca  | # 11          |
| Mouse ADORA1     | ctgccagctttggtgtgac     | accacaaggagagaatcca   | #74           |
| Mouse ADORA2A    | tggctctcacgcagagttc     | ccgtcaccaagccattgta   | #41           |
| Mouse ADORA2B    | gagctccatcttttagcctcttg | tgtcccagtgaccaaaccctt | #83           |
| Mouse ADORA3     | ggagctcgaagttctctgg     | tacttcccaggcaaacaga   | #56           |
| Mouse GAPDH      | gggttcctataaatacggactgc | ccattttgtctacgggacga  | #52           |
| Mouse Beta actin | aaggccaaccgtgaaaagat    | gtggtacgaccagaggcatac | #56           |

**Figure S1.**

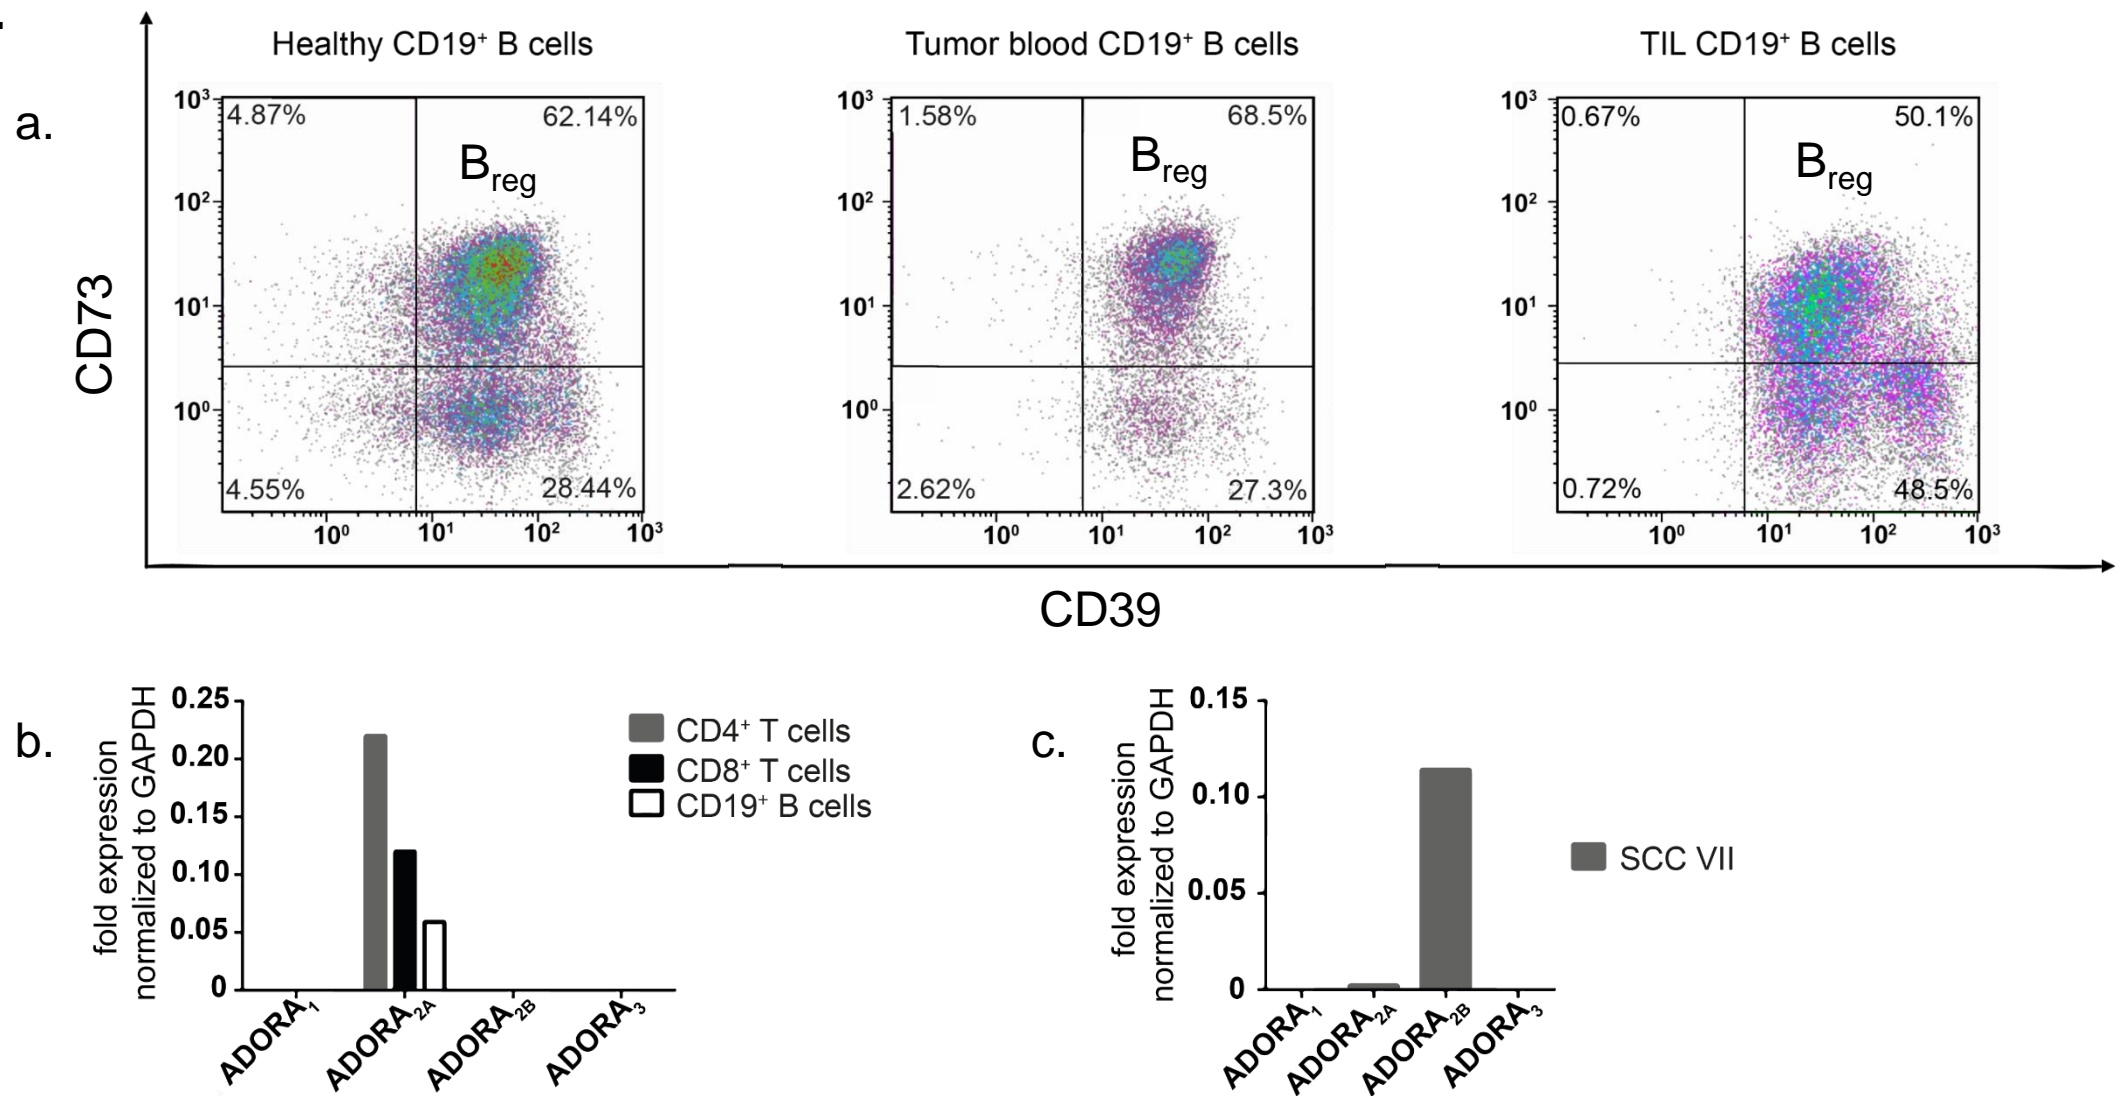

**Fig. S1. (a)** Characterization of human CD19<sup>+</sup> B cells from healthy donors as compared to the phenotype of CD19<sup>+</sup> B cells of the blood and the HNSCC tissue in exemplary plots measured by FACS. **(b/c)** Expression of ADO receptors on murine B cells and tumor cells.
